# Supplementary material
Source: bioRxiv or medRxiv preprint supplement (https://www.biorxiv.org/highwire/filestream/890/field_highwire_adjunct_files/0/003335-1.pdf)
Supplement: Supplementary file [file 003335-1.pdf]

## Supporting Information for

### Rapidly characterizing the fast dynamics of RNA genetic circuitry with cell-free transcription-translation (TX-TL) systems

Melissa K. Takahashi<sup>1,2</sup>, James Chappell<sup>1</sup>, Clarmyra A. Hayes<sup>3</sup>, Zachary Z. Sun<sup>3</sup>, Vipul Singhal<sup>2,3</sup>, Kevin J. Spring<sup>2,4</sup>, Shaima Al-Khabouri<sup>2,5</sup>, Christopher P. Fall<sup>2,6,7</sup>, Vincent Noireaux<sup>8</sup>, Richard M. Murray<sup>2,3</sup>, Julius B. Lucks<sup>1,2\*</sup>

1 – School of Chemical and Biomolecular Engineering, Cornell University, Ithaca NY 14850

2 – CSHL Course in Synthetic Biology, Cold Spring Harbor Laboratory, Cold Spring Harbor, NY

3 – Division of Biology and Biological Engineering, California Institute of Technology, Pasadena, CA

4 – Department of Integrative Biology and Pharmacology, The University of Texas Medical School at Houston, TX

5 – Institute for Research in Immunology and Cancer (IRIC), Université de Montréal, Montréal, Québec, Canada

6 – Department of BioEngineering, University of Illinois, Chicago, IL 60607

7 – Department of Computer Science, Georgetown University, Washington, DC 20057

8 – School of Physics and Astronomy, University of Minnesota, Minneapolis, MN 55455

|                    | Description                                                                                       | TX-TL or <i>in vivo</i> |
|--------------------|---------------------------------------------------------------------------------------------------|-------------------------|
| Supporting Methods | Steady state <i>in vivo</i> gene expression                                                       | <i>In vivo</i>          |
| Figure S1          | The transcriptional attenuation mechanism from the <i>Staphylococcus aureus</i> plasmid pT181     |                         |
| Figure S2          | Supporting plots for Figure 2                                                                     | TX-TL                   |
| Figure S3          | Plasmid architecture for attenuator and antisense plasmids                                        |                         |
| Figure S4          | GFP production rate plots used to calculate the average GFP production in Figure 3B.              | TX-TL                   |
| Figure S5          | Calculation of circuit response time, $\tau$                                                      | TX-TL                   |
| Table S1           | Individual response times ( $\tau$ ) calculated for each experiment                               |                         |
| Table S2           | P-values from Welch's t-test comparing response times from different experiments                  |                         |
| Figure S6          | Magnified plots of Figure 6B                                                                      | TX-TL                   |
| Figure S7          | Plasmid architecture for the 3-plasmid transcription cascade and steady state <i>in vivo</i> data | <i>In vivo</i>          |
| Figure S8          | <i>In vivo</i> SIM plasmid architecture                                                           | <i>In vivo</i>          |
| Table S3           | Important DNA sequences                                                                           |                         |
| Table S4           | Plasmids used in this study                                                                       |                         |
| References         |                                                                                                   |                         |
| Appendix 1         | Estimation of the Response Time of a Double-Inversion RNA Cascade                                 |                         |

## Materials and Methods

### Steady state *in vivo* gene expression

Plasmid combinations were transformed into chemically competent *E. coli* TG1 cells, plated on Difco LB+Agar plates containing 100  $\mu\text{g}/\text{mL}$  carbenicillin, 34  $\mu\text{g}/\text{mL}$  chloramphenicol, and 100  $\mu\text{g}/\text{mL}$  kanamycin and incubated overnight at 37°C. Plates were taken out of the incubator and left at room temperature for approximately 7 h. Four colonies were used to inoculate 300  $\mu\text{L}$  of LB containing carbenicillin, chloramphenicol, and kanamycin at the concentrations above in a 2 mL 96-well block (Costar 3960), and grown approximately 17 h overnight at 37°C at 1,000 rpm in a Labnet Vortemp 56 bench top shaker. Four  $\mu\text{L}$  of this overnight culture were then added to 196  $\mu\text{L}$  (1:50 dilution) of M9 minimal media containing the selective antibiotics and grown for 4 h at the same conditions as the overnight culture. One hundred  $\mu\text{L}$  of this culture were then transferred to a 96-well plate (Costar 3631) containing 100  $\mu\text{L}$  of PBS. SFGFP fluorescence (485 nm excitation, 520 nm emission) and optical density (OD, 600 nm) were then measured using a Biotek SynergyH1m plate reader.

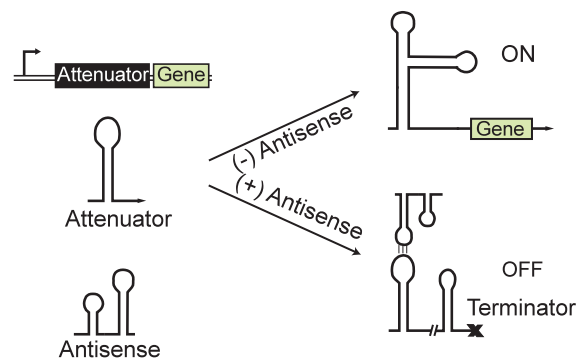

**Figure S1.** The transcriptional attenuation mechanism from the *Staphylococcus aureus* plasmid pT181<sup>1,2</sup>. The attenuator lies in the 5' untranslated region of the transcript and can fold into a structure that will allow transcription to continue if antisense RNA is not present (ON). Antisense RNA binding to the attenuator causes the formation of a terminator hairpin, stopping transcription before the gene of interest (OFF, indicated by x symbol). Figure modified from Takahashi and Lucks<sup>3</sup>.

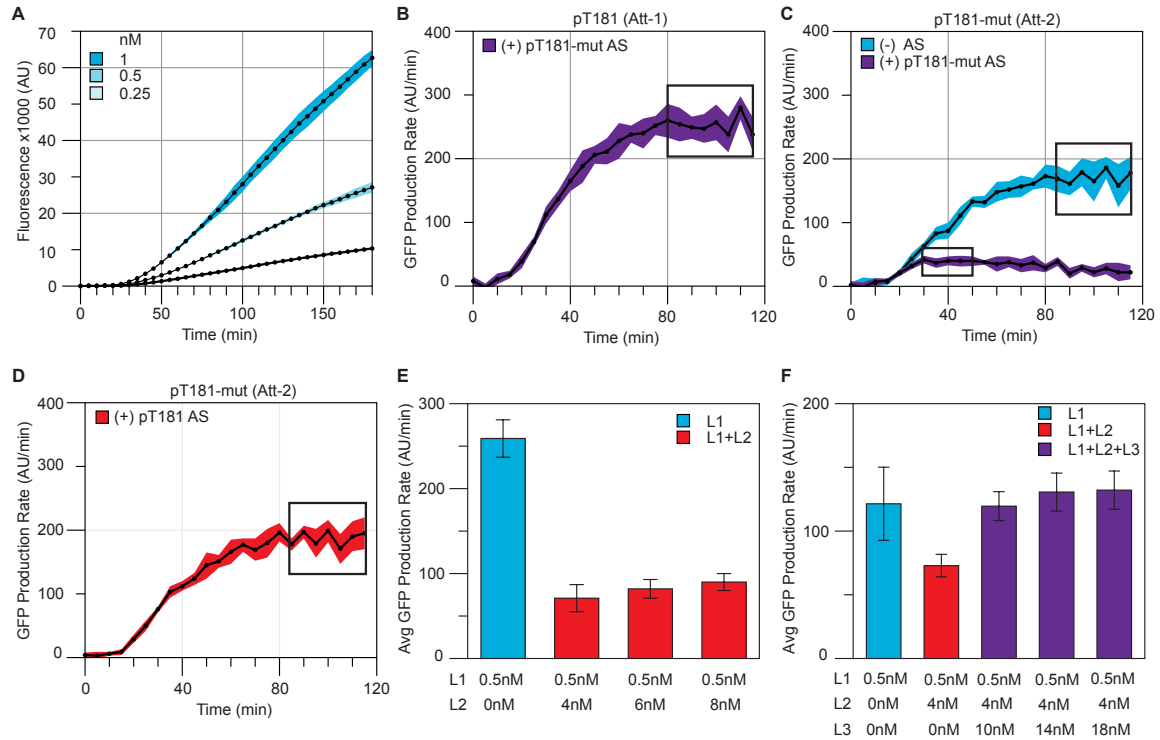

**Figure S2.** (A) Titration of Att-SFGFP plasmid. Fluorescence curves for plasmid concentrations 0.25, 0.5, and 1.0 nM. 0.5 nM was chosen for all further experiments. Shaded regions represent standard deviations of four independent reactions calculated at each time point. (B) – (D) SFGFP production rate curves used to calculate average SFGFP production rates in Figure 2D. Shaded regions represent standard deviations from at least seven independent reactions calculated at each time point. Boxes indicate regions of constant maximum SFGFP production used to calculate averages. (E) Titration of L2 of the transcription cascade in Figure 2E. L1 was held constant at 0.5 nM, while L2 varied between 4 and 8 nM. Average SFGFP production rates are shown with error bars representing standard deviations from four independent reactions. Total DNA concentration was kept at 8.5 nM across all reactions by adding additional no-antisense control DNA. 4 nM of L2 was chosen for all further experiments. (F) Titration of L3 of the transcription cascade in Figure 2E. L1 was held constant at 0.5 nM, L2 at 4 nM, and L3 varied from 10 – 18 nM. Average GFP production rates are shown with error bars representing standard deviations from four independent reactions. Total DNA concentration was kept at 22.5 nM across all reactions by adding additional no-antisense control DNA. 14 nM of L3 was chosen for all further experiments.

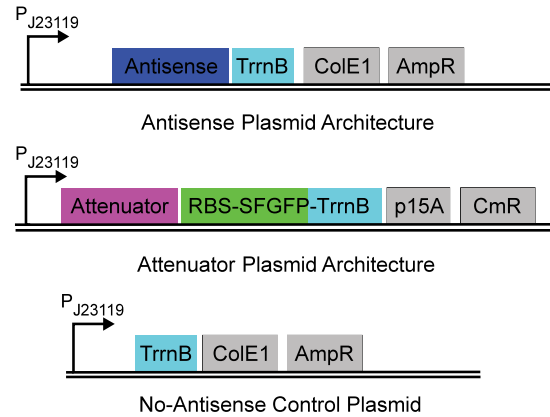

**Figure S3.** Plasmid architecture for attenuator and antisense plasmids. Antisense plasmids have the ColE1 origin and ampicillin resistance (AmpR). Attenuator plasmids have the p15A origin and chloramphenicol resistance (CmR). The J23119 *E. coli* consensus promoter ([http://partsregistry.org/Part:BBa\\_J23119](http://partsregistry.org/Part:BBa_J23119)), modified to include a SpeI site right before the start of transcription, was used for all plasmids. TrnB is a transcriptional terminator. RBS = ribosome binding site; SFGFP = super folder green fluorescent protein coding sequence. See Table S2 for sequence details of these plasmids.

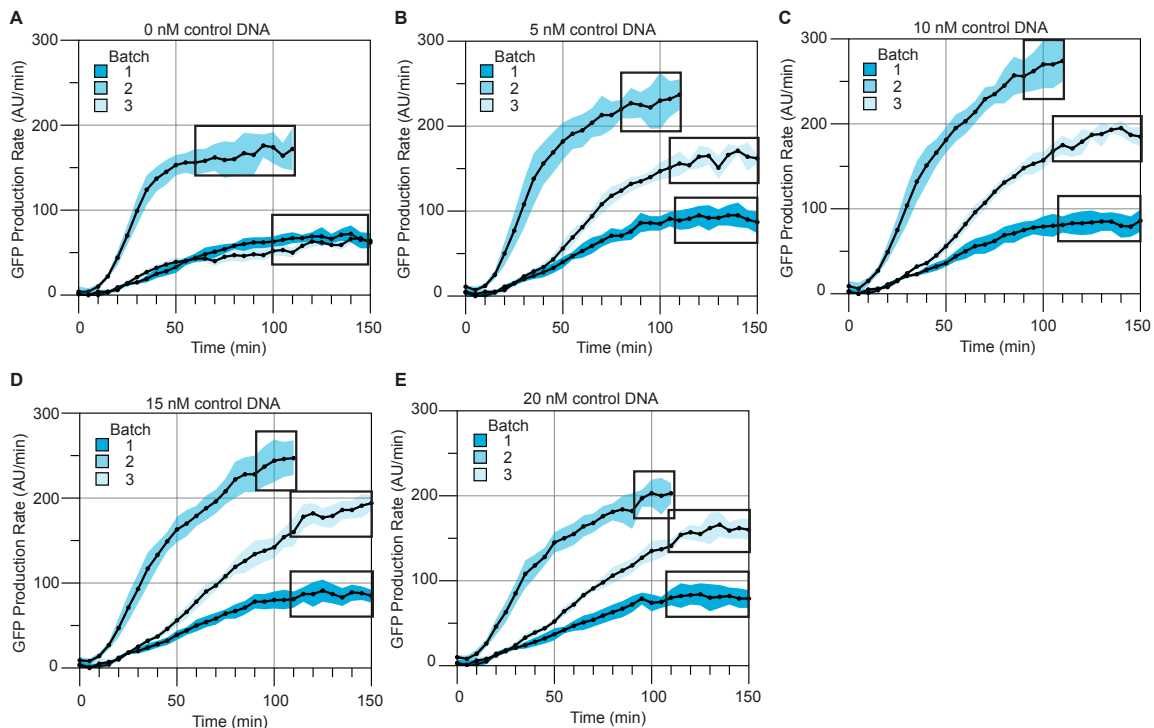

**Figure S4.** GFP production rate plots used to calculate the average GFP production in Figure 3B. 0.5 nM of L1 and the indicated concentration of no-antisense control DNA (0-20 nM) was tested with three extract and buffer batches. Shaded regions represent standard deviations from at least 11 independent reactions calculated at each time point.

Boxes represent constant maximum SFGFP production regions used to calculate averages. Batch 2 reached constant GFP production faster than batches 1 and 3, therefore data was only collected for 2 h for this batch.

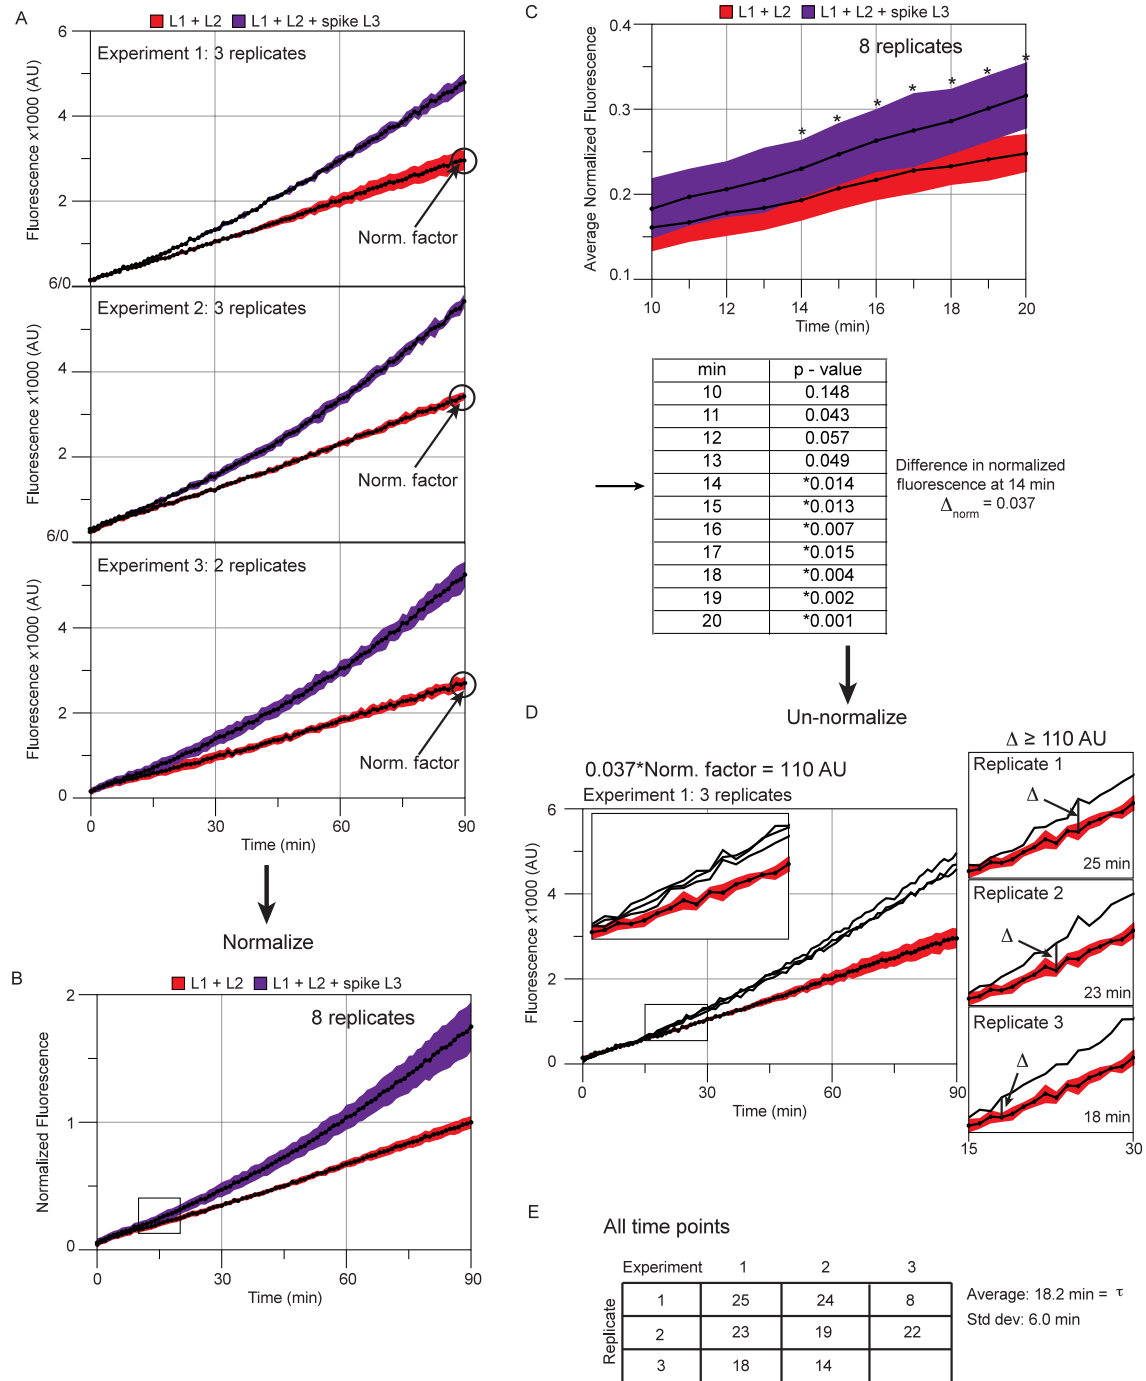

**Figure S5.** Calculation of circuit response time,  $\tau$ . (See “Response Time Calculation” in **Methods**). (A) For the DNA spike experiments, three independent experiments were done with four replicates per experiment. Data was thrown out if a bubble was

introduced into the well during addition of DNA. Averages (black line) plus and minus the standard deviation (shaded areas) are plotted within each experiment. (B) The average endpoint fluorescences of the L1+L2 curves in (A) were used to normalize all data points within an experiment. This allowed for all data points to be combined in a single normalized fluorescence plot. Black lines indicated averages and shaded regions plus/minus standard deviations over the normalized trajectories. (C) For each time point, a Welch's t-test was used to determine whether the L1+L2 and L1+L2+L3 distributions over the normalized experimental replicates were statistically different from each other. The plot shows a zoomed-in region from (B). The \* on the plot indicate times at which the t-test p-value was less than 0.05, with values listed in the table. The difference threshold,  $\Delta_{norm}$ , in averaged normalized fluorescence was calculated at the earliest time where the two data sets were statistically different by this test. (D) For each experiment, the  $\Delta_{norm}$  was converted into an un-normalized scale,  $\Delta$ , by multiplying by the appropriate normalization factor. Each independent L1+L2+L3 trajectory was then compared to the average L1+L2 trajectory for that experiment to find the specific time at which the L1+L2+L3 trajectory was consistently greater than the average L1+L2 curve by  $\Delta$ . These times are defined as the response time for that spike replicate. Example trajectories and response time depiction are shown for experiment 1. (E) Response times were calculated for all replicates and averaged to give the final  $\tau$  value. A similar procedure was used to measure response times from *in vivo* experiments, with variations in the procedure noted in "Response Time Calculation" in **Methods**.

**Table S1.** Individual response times ( $\tau$ ) calculated for each experiment. All times reported in minutes.

| Experiment                            | Individual $\tau$ values                       | Average $\pm$ Std dev | Figure |
|---------------------------------------|------------------------------------------------|-----------------------|--------|
| Att (DNA), 29°C                       | 25, 23, 18, 24, 19, 14, 8, 22, 11              | 18.2 $\pm$ 6.0        | 4      |
| Att (DNA), 37°C                       | 17, 16, 23, 3, 18, 16, 14, 12, 14, 14, 14      | 14.6 $\pm$ 4.8        | 4      |
| Att-Att (DNA), 37°C                   | 19, 15, 25, 17, 14, 17, 28, 15, 25, 14, 25, 19 | 19.4 $\pm$ 5.0        | 5      |
| Att (theophylline), 37°C              | 65, 58, 64, 54, 59, 47, 66, 56, 74, 61, 57, 51 | 59.3 $\pm$ 7.3        | 6      |
| Att-Att (theophylline), 37°C          | 50, 41, 41, 37, 67, 35, 31, 46, 59             | 45.2 $\pm$ 11.7       | 6      |
| SIM ( <i>in vivo</i> ), Att-Att-SFGFP | 50, 40, 50, 30, 30, 30, 50, 30, 40, 30, 50, 50 | 40.0 $\pm$ 9.5        | 7      |
| SIM ( <i>in vivo</i> ), Att-RFP       | 40, 50, 30, 30, 50, 60, 50, 10, 40, 40, 50, 50 | 41.7 $\pm$ 13.4       | 7      |

**Table S2.** P-values from Welch's t-test comparing response times from different experiments.

| Experiment 1    | Experiment 2        | p-value | Figure |
|-----------------|---------------------|---------|--------|
| Att (DNA), 29°C | Att (DNA), 37°C     | 0.1694  | 4      |
| Att (DNA), 37°C | Att-Att (DNA), 37°C | 0.0303  | 4, 5   |

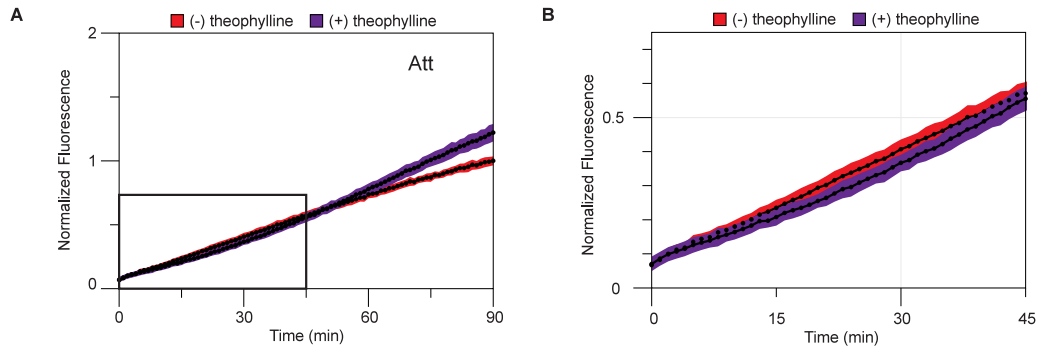

**Figure S6.** (A) Fluorescence trajectories from the theophylline responsive, single attenuator cascade in Figure 6B. (B) Magnified view of the fluorescence trajectories in A from 0 to 45 min to show the dip in the (+) theophylline curve.

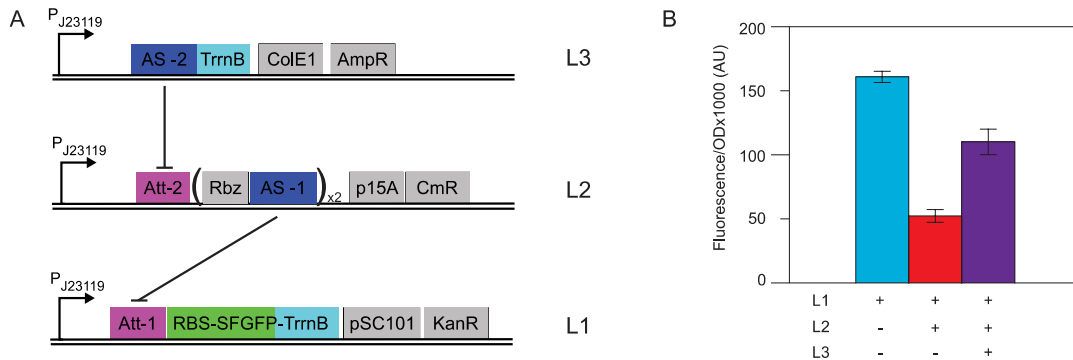

**Figure S7.** (A) Plasmid architecture for the 3-plasmid transcription cascade. L1 contains the pT181 attenuator (Att-1) upstream of the SFGFP coding sequence on a pSC101 backbone with kanamycin resistance. L2 contains the pT181 antisense (AS-1) controlled by the pT181 mutant attenuator (Att-2) on a p15A backbone with chloramphenicol resistance. L3 contains the pT181 mutant antisense (AS-2) on a ColE1 backbone with ampicillin resistance. See Table S2 for sequence details of these plasmids. (B) *In vivo* steady state expression data from cells co-transformed with L1 (blue bar), L1+L2 (red bar), or L1+L2+L3 (purple bar). Control plasmids lacking functional coding sequences were used in place of levels not included. Error bars represent standard deviations of 4 independent transformants.

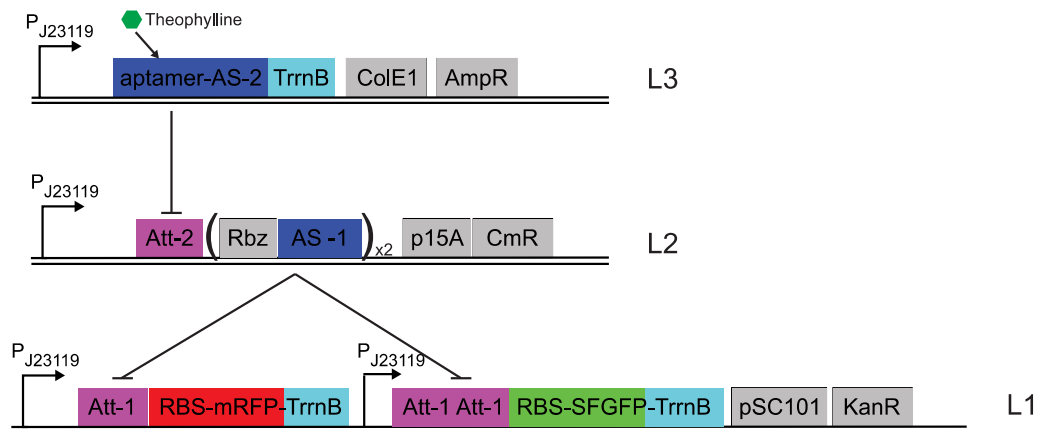

**Figure S8.** *In vivo* SIM plasmid architecture. The bottom level (L1) contains both a single pT181 attenuator (Att-1) upstream of the RFP coding sequence and tandem pT181 attenuators (Att-1 Att-1) upstream of the SFGFP coding sequence on a pSC101 backbone with kanamycin resistance. L2 contains the pT181 antisense (AS-1) controlled by the pT181 mutant attenuator (Att-2) on a p15A backbone with chloramphenicol resistance. L3 contains the theophylline aptamer-pT181 mutant antisense fusion (aptamer-AS-2) on a ColE1 backbone with ampicillin resistance. See Table S2 for sequence details of these plasmids.

**Table S3:** Important DNA sequences

| Name                                                                      | Sequence                                                                                                                                                                                                                                                                                                                                                                                                                                                                                                                                                                                                                                                                                                                                                                                       |
|---------------------------------------------------------------------------|------------------------------------------------------------------------------------------------------------------------------------------------------------------------------------------------------------------------------------------------------------------------------------------------------------------------------------------------------------------------------------------------------------------------------------------------------------------------------------------------------------------------------------------------------------------------------------------------------------------------------------------------------------------------------------------------------------------------------------------------------------------------------------------------|
| pT181 attenuator<br>(EcoRI-J23119-attenuator)                             | GAATTC TAAAGATCT TTTGACAGCTAGCTCAGTCCTAGGTATAATACTAGT AACAA<br>AAATAAAAAGGAGTCGCTCACGCCCTGACCAAAGTTTGTGAACGACATCATT<br>AAAGAAAAAACACTGAGTTGTTTTATAATCTTGTATATTTAGATATTAACGA<br>TATTTAAATATACATAAAGATATATTTGGGTGAGCGATTCTTAAACGAAATT<br>GAGATTAAGGAGTCGCTCTTTTTATGTATAAAAACAATCATGCAAATCATTCA<br>AATCATTGGAAAATCACGATTTAGACAATTTTCTAAAACCGGCTACTCTAAT<br>AGCCGGTTGTAAGGATCT                                                                                                                                                                                                                                                                                                                                                                                                                     |
| pT181-mutant attenuator<br>(EcoRI-J23119-attenuator)                      | GAATTC TAAAGATCT TTTGACAGCTAGCTCAGTCCTAGGTATAATACTAGT AACAA<br>AAATAAAAAGGAGTCGCTCTGTCCCTCGCCAAAGTTGCAGAACGACATCATT<br>AAAGAAAAAACACTGAGTTGTTTTATAATCTTGTATATTTAGATATTAACGA<br>TATTTAAATATACATAAAGATATATTTGGGTGAGCGATTCTTAAACGAAATT<br>GAGATTAAGGAGTCGCTCTTTTTATGTATAAAAACAATCATGCAAATCATTCA<br>AATCATTGGAAAATCACGATTTAGACAATTTTCTAAAACCGGCTACTCTAAT<br>AGCCGGTTGTAAGGATCT                                                                                                                                                                                                                                                                                                                                                                                                                     |
| Super folder green fluorescent protein<br>(Ribosome binding site - SFGFP) | AGGAGGAAGGATCTATGAGCAAAGGAGAAGAACTTTTCACTGGAGTTGTCC<br>AATTCTTGTTGAATTAGATGGTGATGTTAATGGGCACAAATTTCTGTCCGTGG<br>AGAGGGTGAAGGTGATGCTACAAACGGAAAACCTCACCTTAAATTTATTTGCA<br>CTACTGGAAAACCTGTTCCGTGGCCAACTTGTCACTACTCTGACCTAT<br>GGTGTTCATGCTTTTCCCGTTATCCGGATCACATGAAACGGCATGACTTTTT<br>CAAGAGTGCCATGCCCGAAGTTATGTACAGGAACGCATATATCTTTCAAAG<br>ATGACGGGACCTACAAGACGCGTGTGAAGTCAAGTTTGAAGGTGATACCCT<br>TGTTAATCGTATCGAGTTAAAGGGTATTGATTTTAAAGAAGATGGAACATCTT<br>TGGACACAAACTCGAGTACAACTTTAACTCACACAATGTATACATCACGGCAG<br>ACAAACAAAAGAATGGAATCAAAGCTAACTTCAAATTCGCCACAACGTTGAA<br>GATGGTTCCGTTCACTAGCAGACCATTATCAACAAAATACTCCAATTGGCGA<br>TGGCCCTGTCCTTTTACCAGACAACCATTACCTGTCGACACAATCTGTCCTTT<br>CGAAAGATCCCAACGAAAAGCGTGACCACATGGTCCTTCTTGAGTTTGTAACT<br>GCTGCTGGGATTACACATGGCATGGATGAGCTCTACAAA |



|                                                                                |                                                                                                                                                                                                                                                                                                                                                                                                                                                                                                                                                                                                                                                                                                                                                                |
|--------------------------------------------------------------------------------|----------------------------------------------------------------------------------------------------------------------------------------------------------------------------------------------------------------------------------------------------------------------------------------------------------------------------------------------------------------------------------------------------------------------------------------------------------------------------------------------------------------------------------------------------------------------------------------------------------------------------------------------------------------------------------------------------------------------------------------------------------------|
| TrrnB                                                                          | GAAGCTTGGGCCCGAACAAAACTCATCTCAGAAGAGGATCTGAATAGCGCCGTCGACCATCATCATCATCATTGAGTTTAAACGGTCTCCAGCTTGGCTGT<br>TTTGGCGGATGAGAGAAGATTTTCAGCCTGATACAGATTAATCAGAACGCAG<br>AAGCGGTCTGATAAACAGAATTTGCCTGGCGGCAGTAGCGCGGTGGTCCA<br>CCTGACCCCATGCCGAAGTCAAGTAAACGCGTAGCGCCGATGGTAGTG<br>TGGGGTCTCCCATGCGAGAGTAGGGAAGTCCAGGCATCAAATAAACGAA<br>AGGCTCAGTCGAAAGACTGGGCCTTTCGTTTTATCTGTTGTTGTCGGTGAAC<br>T                                                                                                                                                                                                                                                                                                                                                                      |
| Monomeric red fluorescent protein (Ribosome binding site-mRFP)                 | ACAGTCGATGGCAAGTAGCGAAGACGTTATCAAAGAGTTCATGCGTTTCAAAG<br>TTCGTATGGAAGGTTCCGTTAACGGTCACGAGTTCGAAATCGAAGGTGAAGG<br>TGAAGGTCGTCCGTACGAAGGTACCCAGACCGCTAAACTGAAAGTTACCAAA<br>GGTGGTCCGCTGCCGTTTCGCTGGGACATCCTGTCCCGCAGTTCAGTACG<br>GTTCCAAAGCTTACGTTAAACACCCGGCTGACATCCCGGACTACCTGAAACTG<br>TCCTTCCCGGAAGGTTCAAATGGGAACGTGTTATGAACTTCGAAGACGGTG<br>GTGTTGTTACCGTTACCCAGGACTCCTCCCTGCAAGACGGTGAGTTCATCTAC<br>AAAGTTAAACTGCGTGGTACCAACTTCCCGTCCGACGGTCCGGTTATGCAGA<br>AAAAAACCATGGGTTGGGAAGCTTCCACCGAAGTATGTACCCGGAAGACGG<br>TGCTCTGAAAGGTGAAATCAAATGCGTCTGAAACTGAAAGACGGTGGTCACT<br>ACGACGCTGAAGTTAAAACACCTACATGGCTAAAAACCGGTTACAGCTGCC<br>GGGTGCTTACAAAACCGACATCAAAGTGGACATCACCTCCACAACGAAGAC<br>TACACCATCGTTGAACAGTACGAACGTGCTGAAGGTCGTCACCTCCACCGGTG<br>CTTAATAA |
| pT181 antisense (EcoRI-J23119-antisense)                                       | GAATTC TAAAGATCT TTGACAGCTAGCTCAGTCCTAGGTATAAATACTAGT ATAC<br>AAGATTATAAAAACAACTCAGTGTTTTTTCTTTGAATGATGTCGTTCCACAACT<br>TTGGTCAGGGCGTGAGCGACTCCTTTTTATT GGATCT                                                                                                                                                                                                                                                                                                                                                                                                                                                                                                                                                                                                 |
| pT181 mutant antisense (EcoRI-J23119-antisense)                                | GAATTC TAAAGATCT TTGACAGCTAGCTCAGTCCTAGGTATAAATACTAGT ATAC<br>AAGATTATAAAAACAACTCAGTGTTTTTTCTTTGAATGATGTCGTTCTGCAACT<br>TTGGCGAGGGACAGAGCGACTCCTTTTTATT GGATCT                                                                                                                                                                                                                                                                                                                                                                                                                                                                                                                                                                                                 |
| Theophylline aptamer-pT181-mutant antisense (aptamer-antisense-sTRSV-Ribozyme) | GGTGATACCAGCATCGTCTTGATGCCCTTGGCAGCACCTCTTTGAATGGTGTCT<br>GCCCTGCAACTTTGGCGAGGGACAGGGCGACTCCTTTTTATT CTGTCCCGG<br>GATGTGCTTTCCGGTCTGATGAGTCCGTGAGGACGAAACAG                                                                                                                                                                                                                                                                                                                                                                                                                                                                                                                                                                                                    |
| sTRSV Ribozyme                                                                 | CTGTCACCGGATGTGCTTTCCGGTCTGATGAGTCCGTGAGGACGAAACAG                                                                                                                                                                                                                                                                                                                                                                                                                                                                                                                                                                                                                                                                                                             |
| Tandem pT181 attenuators(J23119-attenuator-XhoI-attenuator)                    | TTGACAGCTAGCTCAGTCCTAGGTATAAATACTAGT AACAAAAATAAAAAGGAGT<br>CGCTCACGCCCTGACCAAAGTTTGTGAACGACATCATTCAAAGAAAAAACAC<br>TGAGTTGTTTTATAATCTTGATATTTAGATATTAACGATATTTAAATATACAT<br>AAAGATATATTTGGGTGAGCGATTCTTAAACGAAATTGAGATTAAGGAGT<br>CGCTTTTTTATGTATAAAAACAATCATGCAAATCATTCAAATCATTGGAAAA<br>TCACGATTTAGACAATTTTTCTAAAACCGGCTACTCTAATAGCCGGTTGTAAC<br>CGAGAACAAAATAAAAAGGAGTCGCTCTGTCCCTCGCCAAAAGTTGCAGAACG<br>ACATCATTCAAAGAAAAAACACTGAGTTGTTTTATAATCTTGATATTTAGAT<br>ATTAACGATATTTAAATATACATAAAGATATATTTGGGTGAGCGATTCTTA<br>AACGAAATTGAGATTAAGGAGTCGCTTTTTTATGTATAAAAACAATCATGCA<br>AATCATTCAAATCATTGGAAAATCACGATTTAGACAATTTTTCTAAAACCGGC<br>TACTCTAATAGCCGGTTGTAAGGATCT                                                                                       |

|                                                                      |                                                                                                                                                                                                                                                                                                                                     |
|----------------------------------------------------------------------|-------------------------------------------------------------------------------------------------------------------------------------------------------------------------------------------------------------------------------------------------------------------------------------------------------------------------------------|
| Double pT181 antisense (BamHI-BglII Scar-sTRSV Ribozyme antisense)x2 | GGATCTCTGTCACCGGATGTGCTTTCCGGTCTGATGAGTCCGTGAGGACGAAACAGGGATCTATACAAGATTATAAAAAACAACCTCAGTGTTTTTTCTTTGAATGATGTCGTTACAAAACCTTTGGTCAGGGCGTGAGCGACTCCTTTTTATTGGATCTCTGTCACCGGATGTGCTTTCCGGTCTGATGAGTCCGTGAGGACGAAACAGGGATCCTAACTCGAGATACAAGATTATAAAAAACAACCTCAGTGTTTTTTCTTTGAATGATGTCGTTACAAAACCTTTGGTCAGGGCGTGAGCGACTCCTTTTTATTGGATCT |
|----------------------------------------------------------------------|-------------------------------------------------------------------------------------------------------------------------------------------------------------------------------------------------------------------------------------------------------------------------------------------------------------------------------------|

**Table S4** – Plasmids used in this study. Sequences in the plasmid architecture (Figures S3, S7, S8) can be found in Table S3.

| Plasmid # | Plasmid architecture                                                                                          | Name                                         | Figure                        |
|-----------|---------------------------------------------------------------------------------------------------------------|----------------------------------------------|-------------------------------|
| JBL006    | J23119 – pT181 attenuator – SFGFP – TrnB – CmR – p15A origin                                                  | pT181 attenuator, Att-1                      | 2, 3, 4, 5, 6, S2, S4, S5, S7 |
| JBL004    | J23119 – pT181 antisense – TrnB – ColE1 origin – AmpR                                                         | pT181 antisense, AS-1                        | 2, S2                         |
| JBL002    | J23119 – TrnB – ColE1 origin – AmpR                                                                           | No antisense control                         | 2, 3, 4, 5, S2, S4, S5        |
| JBL007    | J23119 – pT181 mutant attenuator – SFGFP – TrnB – CmR – p15A origin                                           | pT181 mutant attenuator, Att-2               | 2, S2, S8                     |
| JBL008    | J23119 – pT181 mutant antisense – TrnB – ColE1 origin – AmpR                                                  | pT181 mutant antisense, AS-2                 | 2, 4, 5, S2, S5, S8           |
| JBL069    | J23119 – pT181 mutant attenuator – (sTRSV ribozyme – pT181 antisense)x2 – TrnB – ColE1 origin – AmpR          | Cascade L2                                   | 2, 4, 5, 6, S2, S5, S7        |
| JBL015    | J23119 – (pT181 attenuator)x2 – SFGFP – TrnB – CmR – p15A origin                                              | Tandem pT181 attenuators, Att-1-Att-1        | 5, 6                          |
| JBL1843   | J23119 – theophylline aptamer-pT181 mutant antisense – sTRSV ribozyme – TrnB – ColE1 origin – AmpR            | Aptamer pT181 mutant antisense, aptamer-AS-2 | 6, 7, S7                      |
| JBL1852   | J23119 – pT181 attenuator – mRFP – TrnB – J23119 – (pT181 attenuator)x2 – SFGFP – TrnB – pSC101 origin – KanR | SIM L1                                       | 7                             |
| JBL1844   | J23119 – pT181 mutant attenuator – (sTRSV ribozyme – pT181 antisense)x2 – TrnB – CmR – p15A origin            | Cascade L2 on p15A/CmR backbone              | 7, S8                         |
| JBL1855   | J23119 – pT181 attenuator – SFGFP – TrnB – pSC101 origin – KanR                                               | pT181 attenuator                             | S8                            |
| JBL1856   | TrnB – pSC101 origin – KanR                                                                                   | pSC101/KanR control                          | S8                            |

|        |                           |                  |    |
|--------|---------------------------|------------------|----|
| JBL001 | TrrnB – CmR – p15A origin | CmR/p15A control | S8 |
|--------|---------------------------|------------------|----|

### References

- (1) Novick, R. P., Iordanescu, S., Projan, S. J., Kornblum, J., and Edelman, I. (1989) pT181 plasmid replication is regulated by a countertranscript-driven transcriptional attenuator. *Cell* 59, 395–404.
- (2) Brantl, S., and Wagner, E. G. (2000) Antisense RNA-mediated transcriptional attenuation: an in vitro study of plasmid pT181. *Mol Microbiol* 35, 1469–1482.
- (3) Takahashi, M. K., and Lucks, J. B. (2013) A modular strategy for engineering orthogonal chimeric RNA transcription regulators. *Nucleic acids research* 41, 7577–7588.

## APPENDIX 1: ESTIMATION OF THE RESPONSE TIME OF A DOUBLE-INVERSION RNA CASCADE

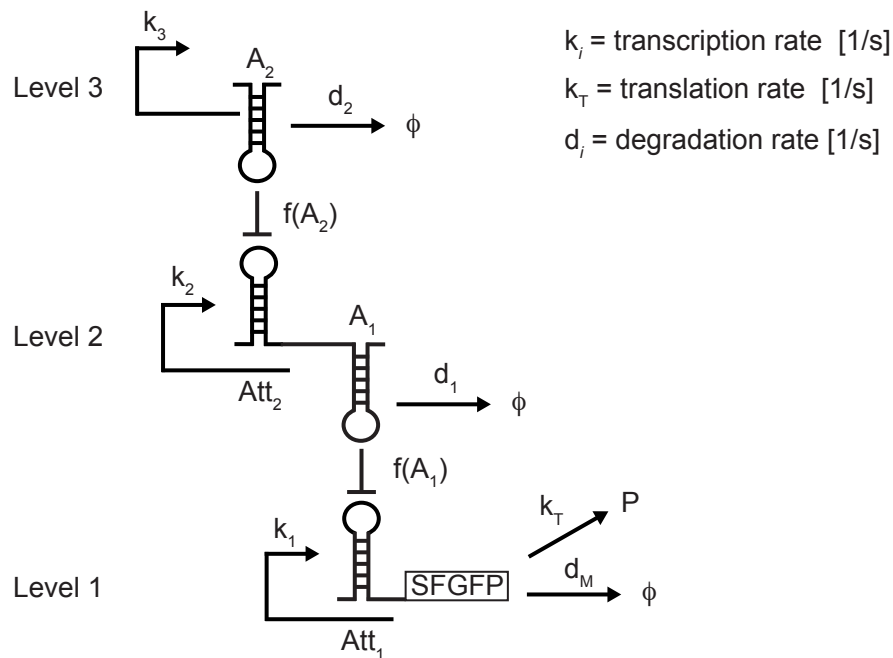

FIGURE 1. A double inversion RNA cascade. The cascade consists of three levels, transcribed from three separate pieces of DNA. Antisense molecules ( $A_i$ ) interact with attenuator sequences ( $Att_i$ ) to suppress the transcription of the sequence downstream of the attenuator. Numbers indicate pairs of antisense-attenuator, which are assumed to be perfectly orthogonal to each other (i.e.  $A_1$  only targets  $Att_1$ , etc.).  $f(A_i)$  relates how much of the downstream sequence is transcribed versus  $A_i$  concentration. Key parameters of the model are indicated.

We consider the double inversion RNA transcriptional cascade depicted in Figure (1). In the simplest model, we can calculate the dynamical behavior of this network using ordinary differential equations that capture the basic chemical reactions of gene expression at each level of the cascade ([1]).

$$\begin{aligned}
(1) \quad & \frac{dA_2}{dt}(t) = k_3 - d_2A_2(t), \\
(2) \quad & \frac{dA_1}{dt}(t) = k_2f(A_2(t)) - d_1A_1(t), \\
(3) \quad & \frac{dM}{dt}(t) = k_1f(A_1(t)) - d_M M(t), \\
(4) \quad & \frac{dP}{dt}(t) = k_T M(t).
\end{aligned}$$

Here  $A_i$  represents the concentration of the antisense signal species, and  $M$  and  $P$  denote the concentrations of mRNA and protein, respectively, of the experimentally observable fluorescent protein encoded in the first level of the cascade. We have also used the approximation that  $P$  does not degrade on the timescale of a TX-TL experiment and therefore has no degradation term. Since these equations represent number of molecules,  $k_i$  and  $d_i$  have units of  $1/s$ .

Note that since this is an RNA circuit, we only need to consider translation of the final reporter level - each of the intermediate levels of the cascade can be described by a single equation representing the transcription and degradation dynamics of the RNA species. We are also ignoring additional effects due to the ribozyme in level 2 that is present in the real cascade (Figure 2E of the main text.)

Our goal is to estimate the response time of this network to a spike in the concentration of the level 3 DNA at time  $t = 0$ . To calculate this estimate, we make the simplifying assumption of a threshold function for  $f(A)$ , following ([1]). Under this assumption  $f(x \geq \beta) = 0$ , and  $f(x < \beta) = 1$  as depicted in Figure (2), for some threshold  $\beta$ . Under this assumption, an antisense species will completely repress the transcription of its target when its concentration is above  $\beta$ .

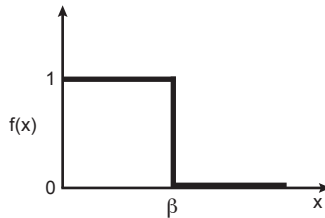

FIGURE 2. The  $f$  function is taken to be a step function with threshold  $\beta$ .

To model the spike experiment, we consider the initial condition

$$(5) \quad A_2(t \leq 0) = 0.$$

We also assume that the reactions have been proceeding long enough before  $t = 0$  for  $A_1$  to have reached steady-state, i.e.

$$(6) \quad A_1(t = 0) = \frac{k_2}{d_1},$$

which uses eq. (5), and our threshold assumption.

We now solve each equation in turn: Using the initial condition eq. (5), and an integration factor, we find

$$(7) \quad A_2(t) = \frac{k_3}{d_2}(1 - e^{-d_2 t}).$$

Solving for  $A_1(t)$  is made easier by considering the time,  $\delta_2$ , at which  $A_2(t)$  reaches the threshold needed to attenuate the transcription of  $A_1$ , which we label  $\beta_2$  (see Figure 5A of the main text). Solving  $A_2(\delta_2) = \beta_2$  gives

$$(8) \quad \delta_2 = \frac{1}{d_2} \ln \left( \frac{k_3/d_2}{k_3/d_2 - \beta_2} \right).$$

Using an integrating factor to solve for  $A_1(t)$ , we find

$$(9) \quad A_1(t) = A_1(0)e^{-d_1 t} + k_2 e^{-d_1 t} \int_0^t f(A_2(t')) e^{d_1 t'} dt'.$$

Using the threshold function, the last integral can be taken from  $t = 0$  to  $t = \delta_2$ , and plugging in the steady state condition for  $A_1(0)$  from eq. (6), we find

$$(10) \quad A_1(t) = \frac{k_2}{d_1} e^{-d_1(t-\delta_2)}.$$

Similarly, to solve for  $M(t)$ , we first find the time,  $\delta_1$ , at which  $A_1(t)$  reaches the threshold needed to attenuate the transcription of  $M$ , which we label  $\beta_1$ . Solving  $A_1(\delta_1) = \beta_1$  gives

$$(11) \quad \delta_1 = \delta_2 + \frac{1}{d_1} \ln \left( \frac{k_2/d_1}{\beta_1} \right).$$

Using an integrating factor to solve for  $M(t)$ , we find

$$(12) \quad M(t) = e^{-d_M t} \left( M(0) + k_1 \int_0^t f(A_1(t')) e^{d_M t'} dt' \right).$$

We assume that initially  $A_1(0) > \beta_1$  so that  $f(A_1(t < \delta_1)) = 0$  and  $M$  is initially not expressed. This also means  $M(0) = 0$  by our threshold assumption. When  $t \geq \delta_1$ , then  $A_1(t) < \beta_1$  and  $M(t)$  can be expressed. Using this, we find

$$(13) \quad M(t) = \begin{cases} 0, & t < \delta_1, \\ \frac{k_1}{d_M} (1 - e^{-d_M(t-\delta_1)}), & t \geq \delta_1. \end{cases}$$

We note that the extra steps of the circuitry effectively delay the response of  $M$  transcription by a time  $\delta_1$ .

In a similar manner we can solve for  $P(t)$ , using the fact that  $P(t < \delta_1) = 0$ :

$$(14) \quad P(t) = k_T \int_0^t M(t') dt' = k_T \int_{\delta_1}^t M(t') dt',$$

which when we use eq. (13) we find

$$(15) \quad P(t) = \begin{cases} 0, & t < \delta_1, \\ \frac{k_T k_1}{d_M} \left( (t - \delta_1) - \frac{1}{d_M} (1 - e^{-d_M(t - \delta_1)}) \right), & t \geq \delta_1. \end{cases}$$

Since the protein must go through a maturation step before it can be observed, characterized by a time  $\alpha$ , we find that the circuit response time,  $\tau = \delta_1 + \alpha$ , to be

$$(16) \quad \tau = \frac{1}{d_2} \ln \left( \frac{k_3/d_2}{k_3/d_2 - \beta_2} \right) + \frac{1}{d_1} \ln \left( \frac{k_2/d_1}{\beta_1} \right) + \alpha.$$

A reasonable estimate for the threshold values is one half of the steady-state concentration of each species, or  $\beta_2 \sim \frac{1}{2} \frac{k_3}{d_2}$  and  $\beta_1 \sim \frac{1}{2} \frac{k_2}{d_1}$ , which gives

$$(17) \quad \tau \sim \ln(2) \left( \frac{1}{d_2} + \frac{1}{d_1} \right) + \alpha.$$

For the tandem attenuator, by the multiplication rule ([2]), we assume  $\beta'_1 \sim \frac{1}{4} \frac{k_2}{d_1}$ , so find

$$(18) \quad \tau' \sim \ln(2) \frac{1}{d_2} + \ln(4) \frac{1}{d_1} + \alpha.$$

Figure 5A in the text shows a graphical representation of these results.

#### REFERENCES

- [1] Alon U (2007) *An Introduction to Systems Biology: Design Principles of Biological Circuits*. Chapman and Hall/CRC, Boca Raton, FL.
- [2] Lucks JB, Qi L, Mutalik VK, Wang D, Arkin AP (2011) Versatile RNA-sensing transcriptional regulators for engineering genetic networks. *PNAS* 108:8617-8622.
